# Supplementary material for: ATAC2GRN: optimized ATAC-seq and DNase1-seq pipelines for rapid and accurate genome regulatory network inference
Source: PubMed Central journal article supplement (PMC6069842; doi:10.1186/s12864-018-4943-z), 2018-07-31

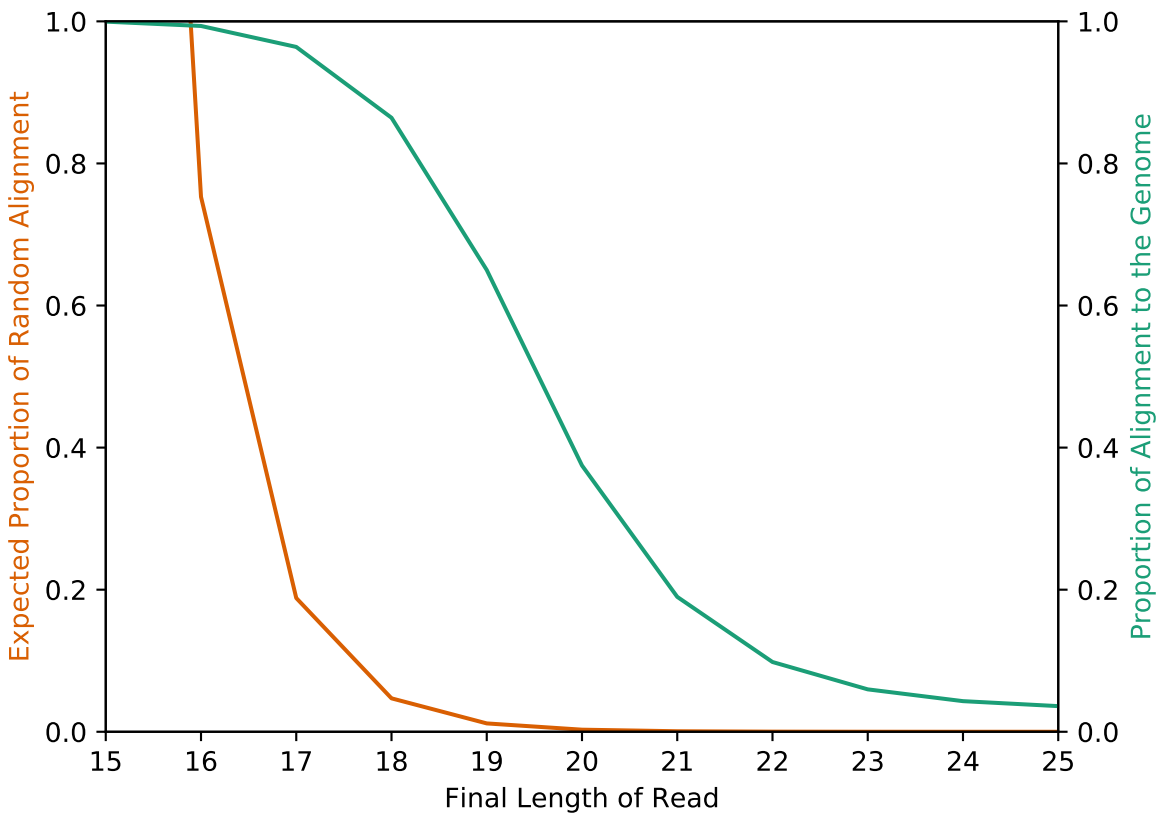

Supplement: 12864_2018_4943_MOESM3_ESM.pdf [file 12864_2018_4943_MOESM3_ESM.pdf]
